# Supplementary material for: Audiogenic Seizures and Social Deficits: No Aggravation Found in Krushinsky–Molodkina Rats
Source: MDPI journal article supplement (doi:10.3390/biomedicines11092566), 2023-09-18
Supplement: s1 [file s1]

**Table S1A. Behavior in the “elevated plus maze” test, between groups comparisons, the 1<sup>st</sup> (pre-provocation) trial**

|                                                         | <b>KM rats<br/>(mean±Std. er. of<br/>mean)</b> | <b>Wistar rats<br/>(mean±Std. er. of<br/>mean)</b> | <b>p-value</b> |
|---------------------------------------------------------|------------------------------------------------|----------------------------------------------------|----------------|
| <i><u>Path length, m</u></i>                            | <u>7,2±0,6</u>                                 | <u>19,6±1,7</u>                                    | <u>0,00002</u> |
| <i><u>Percentage of time spent<br/>in open arms</u></i> | <u>6,2±3,4</u>                                 | <u>16,3±2,4</u>                                    | <u>0,004</u>   |
| <i>Percentage of time spent<br/>in closed arms</i>      | 66,8±4,6                                       | 76,5±3,3                                           | 0,11           |
| <i>Closed/open-arms entry<br/>ratio</i>                 | 3,3±0,8                                        | 3,3±0,8                                            | 0,76           |
| <i>Falls</i>                                            | 0,1±0,1                                        | 0,1±0,1                                            | 0,94           |
| <i><u>Number of rearings</u></i>                        | <u>12,3±1,2</u>                                | <u>20,4±1,9</u>                                    | <u>0,006</u>   |
| <i><u>Number of short grooming</u></i>                  | <u>10,0±1,2</u>                                | <u>2,8±0,8</u>                                     | <u>0,00003</u> |
| <i>Number of hole body<br/>grooming</i>                 | 1,9±0,3                                        | 1,7±0,4                                            | 0,37           |
| <i><u>Number<br/>of freezing episodes</u></i>           | <u>20,5±2,0</u>                                | <u>10,6±2,1</u>                                    | <u>0,001</u>   |
| <i><u>Total freezing time, sec</u></i>                  | <u>212,2±28,9</u>                              | <u>84,5±26,6</u>                                   | <u>0,0003</u>  |
| <i>Stereotypy (head waiving)</i>                        | 1,5±0,3                                        | 0,6±0,3                                            | 0,05           |

*Statistical significance is calculated according to Mann-Whitney U-test.*

*Significantly differing parameters are underlined. Data are represented as the  
mean ± SEM*

**Table S1B. Behavior in the “elevated plus maze” test, between-groups comparisons, the 2<sup>nd</sup> (post-provocation) trial**

|                                                           | <b>KM rats<br/>(mean±Std. er. of<br/>mean)</b> | <b>Wistar rats<br/>(mean±Std. er. of<br/>mean)</b> | <b>p-value</b>  |
|-----------------------------------------------------------|------------------------------------------------|----------------------------------------------------|-----------------|
| <i>Path length, m</i>                                     | 15,9±1,2                                       | 15,7±1,5                                           | 0,69            |
| <i>Percentage of time spent<br/>in open arms</i>          | 1,7±0,6                                        | 13,2±4,8                                           | 0,08            |
| <i><u>Percentage of time spent<br/>in closed arms</u></i> | <u>78,1±4,9</u>                                | <u>53,8±7</u>                                      | <u>0,007</u>    |
| <i>Closed/open-arms entry<br/>ratio</i>                   | 4,1±0,9                                        | 3,3±1,2                                            | 0,34            |
| <i>Falls</i>                                              | 0±0                                            | 0±0                                                |                 |
| <i><u>Number of rearings</u></i>                          | <u>9,9±0,7</u>                                 | <u>20,3±1,7</u>                                    | <u>0,000009</u> |
| <i><u>Number of short grooming</u></i>                    | <u>7,7±0,9</u>                                 | <u>2,3±0,6</u>                                     | <u>0,00003</u>  |
| <i>Number of whole-body<br/>grooming</i>                  | 1,8±0,2                                        | 1,3±0,2                                            | 0,17            |
| <i>Number<br/>of freezing episodes</i>                    | 13,9±2,6                                       | 19±2,4                                             | 0,10            |
| <i>Total freezing time, sec</i>                           | 150,5±29,9                                     | 137±23,3                                           | 0,89            |
| <i>Stereotypy (head waiving)</i>                          | 0,3±0,2                                        | 0,1±0,1                                            | 0,36            |

*Statistical significance is calculated according to Mann-Whitney U-test.*

*Significantly differing parameters are underlined. Data are represented as the  
mean ± SEM*

**Table S1C. Locomotor behavior in the “elevated plus maze” test, within-groups comparisons**

| <b>KM rats, sound provocation subgroup</b> | <b>Pre-provocation</b> | <b>Post-provocation</b> | <b>p-value</b> |
|--------------------------------------------|------------------------|-------------------------|----------------|
| <i><u>Path length, m</u></i>               | <u>7,3±0,9</u>         | <u>16,5±1,9</u>         | <u>0,001</u>   |
| <i><u>Number of freezing episodes</u></i>  | <u>19,0±3,7</u>        | <u>9,4±2,0</u>          | <u>0,04</u>    |
| <i>Total freezing time, sec</i>            | 217,1±46,5             | 124,7±43,6              | 0,10           |

| <b>KM rats, sham subgroup</b>      | <b>Before sham provocation</b> | <b>After sham provocation</b> | <b>p-value</b> |
|------------------------------------|--------------------------------|-------------------------------|----------------|
| <i><u>Path length, m</u></i>       | <u>7,1±0,9</u>                 | <u>15,2±1,7</u>               | <u>0,003</u>   |
| <i>Number of freezing episodes</i> | 22,1±1,8                       | 18,5±4,3                      | 0,14           |
| <i>Total freezing time, sec</i>    | 207,2±38,8                     | 176,3±41,7                    | 0,57           |

| <b>Wistar rats, sound provocation subgroup</b> | <b>Pre-provocation</b> | <b>Post-provocation</b> | <b>p-value</b> |
|------------------------------------------------|------------------------|-------------------------|----------------|
| <i>Path length, m</i>                          | 17,1±2,9               | 14,4±2,5                | 0,44           |
| <i>Number of freezing episodes</i>             | 12,9±3,3               | 19,3±3,4                | 0,23           |
| <i>Total freezing time, sec</i>                | 124,8±48,3             | 142,5±36,4              | 0,50           |

| <b>Wistar rats, sham provocation subgroup</b> | <b>Before sham provocation</b> | <b>After sham provocation</b> | <b>p-value</b> |
|-----------------------------------------------|--------------------------------|-------------------------------|----------------|
| <i>Path length, m</i>                         | 22,0±1,7                       | 17±1,8                        | 0,07           |
| <i><u>Number of freezing episodes</u></i>     | <u>8,4±2,4</u>                 | <u>18,8±3,5</u>               | <u>0,009</u>   |
| <i><u>Total freezing time, sec</u></i>        | <u>44,2±15,4</u>               | <u>131,4±31,5</u>             | <u>0,009</u>   |

*Statistical significance is calculated according to Wilcoxon matched pair test. Significantly differing parameters are written in color. Data are represented as the mean ± SEM*

**Table S1D. Behavior in the “elevated plus maze” test, the 2<sup>nd</sup> (post-provocation) trial. Comparison between KM subgroups: AGS-experienced and sham-stressed rats**

|                                                | KM rats, sound provocation<br>(mean±Std. er. of mean) | KM rats, sham provocation<br>(mean±Std. er. of mean) | p-value     |
|------------------------------------------------|-------------------------------------------------------|------------------------------------------------------|-------------|
| <i>Path length, m</i>                          | 16,5±1,9                                              | 15,3±1,7                                             | 1           |
| <i>Percentage of time spent in open arms</i>   | 2,2±1,0                                               | 1,2±0,5                                              | 0,64        |
| <i>Percentage of time spent in closed arms</i> | 76,6±7,4                                              | 79,6±6,8                                             | 1           |
| <i><u>Closed/open-arms entry ratio</u></i>     | <u>5,9±1,1</u>                                        | <u>2,4±1,0</u>                                       | <u>0,04</u> |
| <i>Falls</i>                                   | 0±0                                                   | 0±0                                                  |             |
| <i>Number of rearings</i>                      | 9,9±0,4                                               | 10,0±1,3                                             | 1           |
| <i>Number of short grooming</i>                | 8,8±1,6                                               | 6,6±0,9                                              | 1           |
| <i>Number of whole-body grooming</i>           | 1,9±0,4                                               | 1,7±0,4                                              | 1           |
| <i>Number of freezing episodes</i>             | 9,4±2,0                                               | 18,5±4,3                                             | 0,08        |
| <i>Total freezing time, sec</i>                | 124,7±43,6                                            | 176,3±41,7                                           | 0,76        |
| <i>Stereotypy (head waiving)</i>               | 0,3±0,3                                               | 0,4±0,2                                              | 1           |

*Statistical significance is calculated according to Mann-Whitney U-test, with Bonferroni corrections. Significantly differing parameters are underlined. Data are represented as the mean ± SEM*

**Table S2. Two-choice social preference test, between-groups comparisons**

|                                                             | <b>KM rats<br/>(mean±Std. er. of<br/>mean)</b> | <b>Wistar rats<br/>(mean±Std. er. of<br/>mean)</b> | <b>p-value</b> |
|-------------------------------------------------------------|------------------------------------------------|----------------------------------------------------|----------------|
| <b>1<sup>st</sup> session, Social preference test</b>       |                                                |                                                    |                |
| <i>Time spent in stimulus rat zone, sec</i>                 | 218,1±92,6                                     | 317,1±75,1                                         | 0,69           |
| <i>Time spent in empty cage zone, sec</i>                   | 342,0±99,2                                     | 245,8±73,0                                         | 0,70           |
| <i>Number of contacts with stimulus rat</i>                 | 4,1±1,7                                        | 10,4±3,6                                           | 0,20           |
| <i>Number of contacts with empty cage</i>                   | 2,3±0,7                                        | 1,6±0,8                                            | 0,97           |
| <i>Number of short contacts with stimulus rat</i>           | 4,1±1,7                                        | 9,5±3,4                                            | 0,28           |
| <i>Number of long contacts with stimulus rat</i>            | 0±0                                            | 0,9±0,5                                            | 0,23           |
| <u><i>Total time of contact with stimulus rat, sec</i></u>  | <u>2,7±1,3</u>                                 | <u>12,0±4,0</u>                                    | <u>0,04</u>    |
| <i>Total time of contact with empty cage, sec</i>           | 1,9±0,8                                        | 0,1±0,1                                            | 0,926          |
| <u><i>Total freezing time, sec</i></u>                      | <u>272,0±48,7</u>                              | <u>97,1±21,7</u>                                   | <u>0,02</u>    |
| <b>2<sup>nd</sup> session, Social novelty test</b>          |                                                |                                                    |                |
| <i>Time spent in familiar stimulus rat zone, sec</i>        | 284,0±105,7                                    | 299,0±78,5                                         | 0,97           |
| <i>Time spent in unfamiliar stimulus rat zone, sec</i>      | 261,9±102,6                                    | 277,4±79,7                                         | 0,99           |
| <i>Number of contacts with familiar stimulus rat</i>        | 2,0±0,9                                        | 2,0±0,5                                            | 1              |
| <i>Number of contacts with unfamiliar stimulus rat</i>      | 3,3±1,6                                        | 5,0±1,4                                            | 0,51           |
| <i>Number of short contacts with familiar stimulus rat</i>  | 2±0,9                                          | 2±0,5                                              | 0,77           |
| <i>Number of long contacts with unfamiliar stimulus rat</i> | 0±0                                            | 0±0                                                |                |
| <i>Number of short contacts with familiar stimulus rat</i>  | 3,1±1,5                                        | 4,4±1,2                                            | 0,39           |
| <i>Number of long contacts with unfamiliar stimulus</i>     | 0,1±0,1                                        | 0,6±0,4                                            | 0,89           |

| <i>rat</i>                                                     |                   |                   |             |
|----------------------------------------------------------------|-------------------|-------------------|-------------|
| <i>Total time of contact with familiar stimulus rat, sec</i>   | 1,8±0,8           | 2,7±0,8           | 0,86        |
| <i>Total time of contact with unfamiliar stimulus rat, sec</i> | 5,4±3,0           | 10,7±4,0          | 0,08        |
| <u><i>Total freezing time, sec</i></u>                         | <u>337,6±32,3</u> | <u>126,2±21,2</u> | <u>0,00</u> |

*Statistical significance is calculated according to Mann-Whitney U-test.  
Significantly differing parameters are underlined. Data are represented as the  
mean ± SEM*

**Table S3A. Socially enriched open field test, the 1<sup>st</sup> trial (pre-provocation),  
between-groups comparisons**

|                                                   | KM rats<br>(mean±Std. er. of<br>mean) | Wistar rats<br>(mean±Std. er. of<br>mean) | p-value         |
|---------------------------------------------------|---------------------------------------|-------------------------------------------|-----------------|
| <i><u>Path length, m</u></i>                      | <u>18,3±2,8</u>                       | <u>45,8±4,9</u>                           | <u>0,0002</u>   |
| <i>% of time in stimulus rat<br/>zone</i>         | 54,9±5,9                              | 43,4±2,6                                  | 0,08            |
| <i><u>% path in the stimulus rat<br/>zone</u></i> | <u>22,6±3,8</u>                       | <u>37,8±5,5</u>                           | <u>0,02</u>     |
| <i>Number of rearings</i>                         | 39,8±5,1                              | 43,3±3,4                                  | 0,76            |
| <i><u>Number of short grooming</u></i>            | <u>17,8±2,0</u>                       | <u>5,6±0,5</u>                            | <u>0,000009</u> |
| <i>Number of long grooming</i>                    | 1,3±0,4                               | 1,2±0,3                                   | 0,98            |
| <i>Number of short contacts</i>                   | 5,1±1,0                               | 8,9±1,7                                   | 0,08            |
| <i><u>Number of long contacts</u></i>             | <u>4,2±1,0</u>                        | <u>9,7±1,5</u>                            | <u>0,007</u>    |
| <i>Defecation</i>                                 | 1,3±0,5                               | 1,4±0,5                                   | 0,98            |
| <i><u>Number<br/>of freezing episodes</u></i>     | <u>38,1±6,2</u>                       | <u>24,0±3,8</u>                           | <u>0,03</u>     |
| <i>Total freezing time, sec</i>                   | 286,2±58,6                            | 224,7±50,9                                | 0,28            |
| <i>Stereotypy (head waiving)</i>                  | 0,3±0,1                               | 0,3±0,1                                   | 0,945           |

*Statistical significance is calculated according to Mann-Whitney U-test.*

*Significantly differing parameters are underlined. Data are represented as the  
mean ± SEM*

**Table S3B. Socially enriched open field test, the locomotor parameters (within-groups comparisons)**

| <b>KM rats, sound provocation</b>  | <b>Pre-provocation</b> | <b>Post-provocation</b> | <b>p-value</b> |
|------------------------------------|------------------------|-------------------------|----------------|
| <i>Path length, m</i>              | 21,7±3,7               | 38,6±6,8                | 0,10           |
| <i>Number of freezing episodes</i> | 42,3±11,4              | 25,5±4,4                | 0,28           |
| <i>Total freezing time, sec</i>    | 319,2±112,5            | 355,6±104,1             | 0,85           |

| <b>KM rats, sham provocation</b>   | <b>Before sham provocation</b> | <b>After sham provocation</b> | <b>p-value</b> |
|------------------------------------|--------------------------------|-------------------------------|----------------|
| <i>Path length, m</i>              | <u>15,0±3,9</u>                | <u>41,0±6,4</u>               | <u>0,008</u>   |
| <i>Number of freezing episodes</i> | 33,8±5,5                       | 30,9±6,8                      | 1              |
| <i>Total freezing time, sec</i>    | 253,2±45,2                     | 360,0±89,3                    | 0,85           |

| <b>Wistar rats, sound provocation</b> | <b>Pre-provocation</b> | <b>Post-provocation</b> | <b>p-value</b> |
|---------------------------------------|------------------------|-------------------------|----------------|
| <i>Path length, m</i>                 | 46,1±5,3               | 51,4±8,1                | 0,50           |
| <i>Number of freezing episodes</i>    | 20,8±4,3               | 25,6±7,4                | 0,79           |
| <i>Total freezing time, sec</i>       | 212±78,6               | 224,4±79,7              | 0,95           |

| <b>Wistar rats, sham provocation</b> | <b>Before sham provocation</b> | <b>After sham provocation</b> | <b>p-value</b> |
|--------------------------------------|--------------------------------|-------------------------------|----------------|
| <i>Path length, m</i>                | 45,6±8,7                       | 65±6,1                        | 0,105          |
| <i>Number of freezing episodes</i>   | 27,3±6,5                       | 19±3,4                        | 0,505          |
| <i>Total freezing time, sec</i>      | 237,4±69,7                     | 138,5±29,7                    | 0,442          |

*Statistical significance is calculated according to Wilcoxon matched pair test. Significantly differing parameters are written in color. Data are represented as the mean ± SEM*



**Table S3C. Socially enriched open field, between subgroups comparisons:  
Comparison between KM subgroups: AGS-experienced and sham-stressed rats**

|                                        | <b>KM sound<br/>provocation<br/>(mean±SEM)</b> | <b>KM sham<br/>provocation<br/>(mean±SEM.)</b> | <b>p-value</b> |
|----------------------------------------|------------------------------------------------|------------------------------------------------|----------------|
| <i>Path length, m</i>                  | 38,6±6,8                                       | 41±6,4                                         | 1              |
| % path in the stimulus rat zone        | 9,9±2,5                                        | 18,2±3,8                                       | 0,13           |
| <i>Number of rearings</i>              | 21,5±6,3                                       | 29,4±6,6                                       | 0,78           |
| <u><i>Number of short grooming</i></u> | <u>9,1±2,5</u>                                 | <u>14,6±2,6</u>                                | <u>0,05</u>    |
| <i>Number of long grooming</i>         | 1,4±0,4                                        | 0,9±0,3                                        | 0,76           |
| <i>Number of freezing episodes</i>     | 25,5±4,4                                       | 30,9±6,8                                       | 1              |
| <i>Number of short contacts</i>        | 2,6±1,1                                        | 3,9±1,5                                        | 1              |
| <i>Number of long contacts</i>         | 2,1±0,6                                        | 3,1±1,1                                        | 1              |
| <i>Defecation</i>                      | 0,1±0,1                                        | 0,5±0,2                                        | 0,47           |
| <i>Stereotypy<br/>(head waiving)</i>   | 0,3±0,2                                        | 0,3±0,3                                        | 1              |

*Statistical significance is calculated according to Mann-Whitney U-test, with Bonferroni corrections. Significantly differing parameters are written in color. Data are represented as the mean ± SEM*

**Table S3D. Socially enriched open field test, the 2<sup>nd</sup> trial (post-provocation),  
between groups comparisons**

|                                            | <i>KM rats<br/>(mean±Std. er. of<br/>mean)</i> | <i>Wistar rats<br/>(mean±Std. er. of<br/>mean)</i> | <b>p-value</b> |
|--------------------------------------------|------------------------------------------------|----------------------------------------------------|----------------|
| <u>Path length, m</u>                      | <u>39,8±4,5</u>                                | <u>58,2±5,2</u>                                    | <u>0,02</u>    |
| <u>% of time in stimulus rat<br/>zone</u>  | <u>10,6±1,7</u>                                | <u>21,3±2,7</u>                                    | <u>0,006</u>   |
| <u>% path in the stimulus rat<br/>zone</u> | <u>14,1±2,4</u>                                | <u>21,3±2,4</u>                                    | <u>0,03</u>    |
| <u>Number of rearings</u>                  | <u>25,4±4,5</u>                                | <u>44,3±5,3</u>                                    | <u>0,02</u>    |
| <u>Number of short grooming</u>            | <u>11,9±1,9</u>                                | <u>6,1±1,3</u>                                     | <u>0,002</u>   |
| Number of long grooming                    | 1,1±0,2                                        | 0,9±0,3                                            | 0,42           |
| Number<br>of freezing episodes             | 28,2±4,0                                       | 22,3±4,0                                           | 0,30           |
| <u>Total freezing time, sec</u>            | <u>357,8±66,3</u>                              | <u>181,5±42,6</u>                                  | <u>0,02</u>    |
| <u>Number of short contacts</u>            | <u>3,3±0,9</u>                                 | <u>8,6±1,5</u>                                     | <u>0,003</u>   |
| <u>Number of long contacts</u>             | <u>2,6±0,6</u>                                 | <u>10,7±1,3</u>                                    | <u>0,00001</u> |
| Stereotypy (head waiving)                  | 0,3±0,1                                        | 0±0                                                | 0,38           |

Statistical significance is calculated according to Mann-Whitney U-test.  
Significantly differing parameters are underlined. Data are represented as the  
mean ± SEM

**Table S4A Three-chambered social preference test, the 1<sup>st</sup> trial (pre-provocation), between-groups comparisons**

|                                                                 | <i>KM rats<br/>(mean±Std. er. of<br/>mean)</i> | <i>Wistar rats<br/>(mean±Std. er. of<br/>mean)</i> | <i>p-value</i> |
|-----------------------------------------------------------------|------------------------------------------------|----------------------------------------------------|----------------|
| <i>Path length, m</i>                                           | 15,8±3                                         | 22,2±2,4                                           | 0,09           |
| <i><u>Path length in stimulus rat<br/>compartment, m</u></i>    | <u>4,2±1,3</u>                                 | <u>10,5±1,2</u>                                    | <u>0,0004</u>  |
| <i>Path length in the empty<br/>cage compartment, m</i>         | 5,4±1                                          | 6±0,9                                              | 0,56           |
| <i>Path length in the<br/>intermediate<br/>compartment, m</i>   | 6±1,3                                          | 5,7±0,7                                            | 0,98           |
| <i><u>Time spent in stimulus rat<br/>compartment, sec</u></i>   | <u>106,5±21,1</u>                              | <u>187,8±19,5</u>                                  | <u>0,02</u>    |
| <i><u>Time spent in the empty<br/>cage compartment, sec</u></i> | <u>317,6±47</u>                                | <u>173,2±16,8</u>                                  | <u>0,009</u>   |
| <i>Time spent in the<br/>intermediate<br/>compartment, sec</i>  | 175,6±33,3                                     | 239,1±25,4                                         | 0,18           |
| <i>Number of rearings</i>                                       | 9,1±1,9                                        | 14±1,8                                             | 0,09           |
| <i>Number of short grooming</i>                                 | 3,8±0,9                                        | 5±0,9                                              | 0,39           |
| <i>Number of long grooming</i>                                  | 1,3±0,6                                        | 1±0,2                                              | 0,59           |
| <i><u>Number of contacts with<br/>stimulus rat</u></i>          | <u>1,5±0,6</u>                                 | <u>6,3±0,8</u>                                     | <u>0,00003</u> |
| <i>Number<br/>of freezing episodes</i>                          | 17,7±3,8                                       | 9,1±1,8                                            | 0,06           |
| <i><u>Total freezing time, sec</u></i>                          | <u>188,7±46,7</u>                              | <u>56,9±13,7</u>                                   | <u>0,04</u>    |
| <i>Stereotypy (head waiving)</i>                                | 1,4±0,7                                        | 0,8±0,4                                            | 0,8            |

*Statistical significance is calculated according to Mann-Whitney U-test.*

*Significantly differing parameters are underlined. Data are represented as the mean ± SEM*

**Table S4B. Three-chambered social preference test, within-groups comparisons of locomotor parameters**

| <b>KM rats, sound provocation subgroup</b> | <b>Pre-provocation</b> | <b>Post-provocation</b> | <b>p-value</b> |
|--------------------------------------------|------------------------|-------------------------|----------------|
| <i>Path length, m</i>                      | 15,7±5,4               | 25,3±5,5                | 0,31           |
| <i>Number of freezing episodes</i>         | 17,3±4,6               | 11,3±6,8                | 0,18           |
| <i>Average freezing time, sec</i>          | 9,2±2,2                | 5,5±0,7                 | 0,39           |
| <i>Total freezing time, sec</i>            | 195,8±73,9             | 82,6±56,3               | 0,13           |

| <b>KM rats, sham provocation subgroup</b> | <b>Before sham provocation</b> | <b>After sham provocation</b> | <b>p-value</b> |
|-------------------------------------------|--------------------------------|-------------------------------|----------------|
| <u><i>Path length, m</i></u>              | <u>16,0±3,2</u>                | <u>27,5±3,3</u>               | <u>0,03</u>    |
| <i>Number of freezing episodes</i>        | 18,0±6,4                       | 8,0±4,1                       | 0,12           |
| <u><i>Total freezing time, sec</i></u>    | <u>181,6±64,1</u>              | <u>45,2±23,5</u>              | <u>0,05</u>    |

| <b>Wistar rats, sound provocation subgroup</b> | <b>Pre-provocation</b> | <b>Post-provocation</b> | <b>p-value</b> |
|------------------------------------------------|------------------------|-------------------------|----------------|
| <i>Path length, m</i>                          | 21,5±3,8               | 29,2±5,3                | 0,27           |
| <i>Number of freezing episodes</i>             | 9,3±2,5                | 5,6±1,9                 | 0,16           |
| <i>Average freezing time, sec</i>              | 6,1±0,4                | 10,3±5,1                | 0,50           |
| <i>Total freezing time, sec</i>                | 59,6±19,6              | 51,3±20,1               | 0,44           |

| <b>Wistar rats, sham provocation subgroup</b> | <b>Before sham provocation</b> | <b>After sham provocation</b> | <b>p-value</b> |
|-----------------------------------------------|--------------------------------|-------------------------------|----------------|
| <i>Path length, m</i>                         | 23±3,3                         | 30,2±2,2                      | 0,16           |
| <i>Number of freezing episodes</i>            | 8,9±2,8                        | 4,6±0,9                       | 0,38           |
| <i>Average freezing time, sec</i>             | 5,2±0,5                        | 8,2±1,8                       | 0,23           |
| <i>Total freezing time, sec</i>               | 54,3±20,4                      | 43,2±14,1                     | 0,79           |

*Statistical significance is calculated according to Wilcoxon matched pair test. Significantly differing parameters are written in color. Data are represented as the mean  $\pm$  SEM*

**Table S4C. Three-chambered social preference test, 2<sup>nd</sup> trial (post-provocation).  
Comparison between KM subgroups: AGS-experienced and sham-stressed rats**

|                                                                | <b><i>KM sound<br/>provocation<br/>(mean±SEM)</i></b> | <b><i>KM sham<br/>provocation<br/>(mean±SEM)</i></b> | <b><i>p-value</i></b> |
|----------------------------------------------------------------|-------------------------------------------------------|------------------------------------------------------|-----------------------|
| <i>Path length, m</i>                                          | 25,3±5,5                                              | 27,5±3,3                                             | 1                     |
| <i>Path length in stimulus rat<br/>compartment, m</i>          | 8,0±2,8                                               | 7,9±1,2                                              | 1                     |
| <i>Path length in the empty<br/>cage compartment, m</i>        | 10,7±1,1                                              | 10,0±2,0                                             | 1                     |
| <i>Path length in the<br/>intermediate<br/>compartment, m</i>  | 6,0±2,2                                               | 9,7±1,7                                              | 1                     |
| <i>Number of rearings</i>                                      | 2,5±1,1                                               | 2,2±0,9                                              | 1                     |
| <i>Number of short grooming</i>                                | 3,8±1,0                                               | 2,4±1,5                                              | 0,84                  |
| <i>Number of long grooming</i>                                 | 0,3±0,3                                               | 0,2±0,2                                              | 1                     |
| <i>Number of short contacts<br/>with stimulus rat</i>          | 4,5±0,8                                               | 5,8±1,2                                              | 1                     |
| <i>Number of long contacts<br/>with stimulus rat</i>           | 2,7±0,7                                               | 3,2±0,5                                              | 0,65                  |
| <i>Time spent in stimulus rat<br/>compartment, sec</i>         | 121,3±41,7                                            | 216,2±23,2                                           | 0,35                  |
| <i>Time spent in the empty<br/>cage compartment, sec</i>       | 291,4±42,2                                            | 207,7±28,3                                           | 0,50                  |
| <i>Time spent in the<br/>intermediate<br/>compartment, sec</i> | 187,3±19,3                                            | 176,1±30,8                                           | 1                     |
| <i>Number<br/>of freezing episodes</i>                         | 11,3±6,8                                              | 8,0±4,1                                              | 1                     |
| <i>Total freezing time, sec</i>                                | 82,6±56,3                                             | 45,2±23,5                                            | 1                     |
| <i>Stereotypy (head waiving)</i>                               | 0±0                                                   | 0±0                                                  |                       |

*Statistical significance is calculated according to Mann-Whitney U-test, with Bonferroni corrections. Significantly differing parameters are written in color. Data are represented as the mean ± SEM*

**Table S4D. Three-chambered social preference, the 2nd trial (post-provocation),  
between-groups comparisons**

|                                                                | <b><i>KM rats<br/>(mean±Std. er.<br/>of mean)</i></b> | <b><i>Wistar rats<br/>(mean±Std. er. of<br/>mean)</i></b> | <b><i>p-value</i></b> |
|----------------------------------------------------------------|-------------------------------------------------------|-----------------------------------------------------------|-----------------------|
| <i>Path length, m</i>                                          | 26,3±3,2                                              | 29,7±2,8                                                  | 0,57                  |
| <i>Path length in stimulus rat<br/>compartment, m</i>          | 7,9±1,5                                               | 9,8±1,1                                                   | 0,45                  |
| <i>Path length in the empty<br/>cage compartment, m</i>        | 10,4±1,1                                              | 12,5±1,6                                                  | 0,34                  |
| <i>Path length in the<br/>intermediate<br/>compartment, m</i>  | 8,0±1,5                                               | 7,4±0,9                                                   | 0,90                  |
| <u><i>Time spent in stimulus rat<br/>compartment, sec</i></u>  | <u>164,4±28,2</u>                                     | <u>266,1±26,5</u>                                         | <u>0,01</u>           |
| <i>Time spent in the empty<br/>cage compartment, sec</i>       | 253,4±28,4                                            | 187±20,2                                                  | 0,09                  |
| <i>Time spent in the<br/>intermediate<br/>compartment, sec</i> | 182,2±16,7                                            | 146,9±18,8                                                | 0,21                  |
| <u><i>Number of short grooming</i></u>                         | <u>2,4±0,7</u>                                        | <u>9,1±1,3</u>                                            | <u>0,0002</u>         |
| <u><i>Number of long grooming</i></u>                          | <u>0,3±0,2</u>                                        | <u>1,4±0,2</u>                                            | <u>0,003</u>          |
| <i>Number of short contacts<br/>with stimulus rat</i>          | 3,2±0,9                                               | 3,7±1,0                                                   | 0,90                  |
| <i>Number of long contacts<br/>with stimulus rat</i>           | 2,9±0,4                                               | 4,0±0,5                                                   | 0,16                  |
| <i>Number<br/>of freezing episodes</i>                         | 9,8±4,0                                               | 5,1±1,0                                                   | 0,79                  |
| <i>Total freezing time, sec</i>                                | 65,6±31,6                                             | 47,2±11,9                                                 | 0,54                  |
| <i>Stereotypy (head waiving)</i>                               | 0±0                                                   | 0±0                                                       |                       |

*According to Mann-Whitney U-test. Significantly differing parameters are underlined. Data are represented as the mean ± SEM*

**Table S5A. Three-chambered social novelty, the 1st trial (pre-provocation),  
between-groups comparisons**

|                                                                           | <i>KM rats<br/>(mean±Std. er. of<br/>mean)</i> | <i>Wistar rats<br/>(mean±Std. er. of<br/>mean)</i> | <i>p-value</i>  |
|---------------------------------------------------------------------------|------------------------------------------------|----------------------------------------------------|-----------------|
| <u>Path length, m</u>                                                     | <u>4,0±0,8</u>                                 | <u>12,6±1,7</u>                                    | <u>0,00004</u>  |
| <u>Path length in familiar<br/>stimulus rat compartment,<br/>m</u>        | <u>0,6±0,3</u>                                 | <u>3,6±0,6</u>                                     | <u>0,0003</u>   |
| <u>Path length in the<br/>unfamiliar stimulus rat<br/>compartment, m</u>  | <u>2,0±0,5</u>                                 | <u>5,3±0,8</u>                                     | <u>0,002</u>    |
| <u>Path length in the<br/>intermediate<br/>compartment, m</u>             | <u>1,6±0,5</u>                                 | <u>3,6±0,6</u>                                     | <u>0,02</u>     |
| <u>Time spent in familiar<br/>stimulus rat compartment,<br/>sec</u>       | <u>61,0±24,4</u>                               | <u>196,3±31,7</u>                                  | <u>0,002</u>    |
| <u>Time spent in the<br/>unfamiliar stimulus rat<br/>compartment, sec</u> | 271,1±51,4                                     | 272,0±26,6                                         | 0,69            |
| <u>Time spent in the<br/>intermediate<br/>compartment, sec</u>            | <u>271,4±50,9</u>                              | <u>131,7±15,9</u>                                  | <u>0,0003</u>   |
| <u>Number of rearings</u>                                                 | <u>1,4±0,5</u>                                 | <u>8,6±1,3</u>                                     | <u>0,00002</u>  |
| <u>Number of short grooming</u>                                           | 1,8±0,7                                        | 4,1±1,0                                            | 0,06            |
| <u>Number of long grooming</u>                                            | <u>0±0</u>                                     | <u>1,4±0,2</u>                                     | <u>0,0001</u>   |
| <u>Number of contacts<br/>with familiar stimulus rat</u>                  | <u>0,3±0,1</u>                                 | <u>2,7±0,3</u>                                     | <u>0,000001</u> |
| <u>Number of contacts<br/>with unfamiliar stimulus<br/>rat</u>            | <u>0,8±0,3</u>                                 | <u>4,1±0,7</u>                                     | <u>0,001</u>    |
| <u>Number<br/>of freezing episodes</u>                                    | 19,3±3,2                                       | 18,2±2,4                                           | 0,66            |
| <u>Total freezing time, sec</u>                                           | <u>467,6±20,1</u>                              | <u>135,2±27,1</u>                                  | <u>0,00</u>     |
| <u>Stereotypy (head waiving)</u>                                          | 0,9±0,4                                        | 0,6±0,2                                            | 0,83            |



*Statistical significance is calculated according to Mann-Whitney U-test.  
Significantly differing parameters are underlined. Data are represented as the  
mean  $\pm$  SEM*

**Table S5B. Three-chambered social novelty test, within-groups comparisons (the locomotor parameters between the two trials)**

| <b>KM rats, sound provocation subgroup</b> | <b>Pre-provocation</b> | <b>Post-provocation</b> | <b>p-value</b> |
|--------------------------------------------|------------------------|-------------------------|----------------|
| <i><u>Path length, m</u></i>               | <u>3,1±0,7</u>         | <u>14,8±3,4</u>         | <u>0,009</u>   |
| <i>Number of freezing episodes</i>         | 18,0±5,9               | 16,3±2,6                | 0,81           |
| <i><u>Total freezing time, sec</u></i>     | <u>480,5±27,5</u>      | <u>196,8±55,6</u>       | <u>0,002</u>   |

| <b>KM rats, sham provocation subgroup</b> | <b>Before sham provocation</b> | <b>After sham provocation</b> | <b>p-value</b> |
|-------------------------------------------|--------------------------------|-------------------------------|----------------|
| <i>Path length, m</i>                     | 4,9±1,5                        | 7,0±2,8                       | 0,66           |
| <i>Number of freezing episodes</i>        | 20,5±3,0                       | 18,4±2,1                      | 0,24           |
| <i>Total freezing time, sec</i>           | 454,6±31                       | 319,5±79,9                    | 0,32           |

| <b>Wistar rats, sound provocation</b> | <b>Pre-provocation</b> | <b>Post-provocation</b> | <b>p-value</b> |
|---------------------------------------|------------------------|-------------------------|----------------|
| <i>Path length, m</i>                 | 14,1±2,7               | 18,3±3,1                | 0,27           |
| <i>Number of freezing episodes</i>    | 15,8±3,8               | 10,4±1,3                | 0,27           |
| <i>Total freezing time, sec</i>       | 117,1±45               | 64,2±10,7               | 0,44           |

| <b>Wistar rats, sham provocation</b>      | <b>Before sham provocation</b> | <b>After sham provocation</b> | <b>p-value</b> |
|-------------------------------------------|--------------------------------|-------------------------------|----------------|
| <i><u>Path length, m</u></i>              | <u>11,0±2,0</u>                | <u>19,4±1,6</u>               | <u>0,01</u>    |
| <i><u>Number of freezing episodes</u></i> | <u>20,6±2,9</u>                | <u>11,6±2,0</u>               | <u>0,021</u>   |
| <i>Total freezing time, sec</i>           | 153,2±31,9                     | 73,5±14,1                     | 0,06           |

*Statistical significance is calculated according to Wilcoxon matched pair test. Significantly differing parameters are written in color. Data are represented as the mean ± SEM*

**Table S5C. Three-chambered social novelty test, 2<sup>nd</sup> trial (post-provocation),  
between KM subgroups comparison**

|                                                                      | <b><i>KM sound<br/>provocation<br/>(mean±SEM)</i></b> | <b><i>KM sham<br/>provocation<br/>(mean±SEM)</i></b> | <b><i>p-value</i></b> |
|----------------------------------------------------------------------|-------------------------------------------------------|------------------------------------------------------|-----------------------|
| <i>Path length, m</i>                                                | 14,8±3,4                                              | 7,0±2,8                                              | 0,50                  |
| <i>Path length in stimulus rat<br/>compartment, m</i>                | 4,6±0,9                                               | 2,8±1,4                                              | 065                   |
| <i>Path length in the empty<br/>cage compartment, m</i>              | 4,9±1,3                                               | 1,5±1,1                                              | 0,35                  |
| <i>Path length in the<br/>intermediate<br/>compartment, m</i>        | 5,2±1,6                                               | 2,7±0,5                                              | 0,85                  |
| <i>Time spent in stimulus rat<br/>compartment, sec</i>               | 282,4±64,5                                            | 206,8±68,7                                           | 1                     |
| <i>Time spent in the empty<br/>cage compartment, sec</i>             | 174,9±41,8                                            | 96,5±57,7                                            | 0,85                  |
| <i>Time spent in the<br/>intermediate<br/>compartment, sec</i>       | 142,7±24,1                                            | 296,8±69,4                                           | 0,50                  |
| <i>Number of rearings</i>                                            | 7,5±2,2                                               | 10,2±3,2                                             | 1                     |
| <i>Number of short grooming</i>                                      | 2,7±0,9                                               | 3,6±1,3                                              | 1                     |
| <i>Number of long grooming</i>                                       | 2,0±1,2                                               | 0,2±0,2                                              | 0,35                  |
| <i>Number of short contacts<br/>with familiar stimulus rat</i>       | 2,2±1,2                                               | 2,0±0,6                                              | 1                     |
| <i>Number of long contacts<br/>with familiar stimulus rat</i>        | 0,5±0,3                                               | 0,2±0,2                                              | 1                     |
| <i>Number of short contacts<br/>with unfamiliar stimulus<br/>rat</i> | 3,7±1,3                                               | 0,4±0,2                                              | 0,06                  |
| <i>Number of long contacts<br/>with unfamiliar stimulus<br/>rat</i>  | 2,2±0,7                                               | 0,2±0,2                                              | 0,06                  |
| <i>Number<br/>of freezing episodes</i>                               | 16,3±2,6                                              | 18,4±2,1                                             | 1                     |
| <i>Total freezing time, sec</i>                                      | 196,8±55,6                                            | 319,5±79,9                                           | 0,50                  |
| <i>Stereotypy (head waiving)</i>                                     | 0,5±0,2                                               | 0,2±0,2                                              | 0,85                  |

*Statistical significance is calculated according to Mann-Whitney U-test, with Bonferroni corrections. Significantly differing parameters are written in color. Data are represented as the mean  $\pm$  SEM*

**Table S5D. Three-chambered social novelty test, the 2<sup>nd</sup> trial (post-provocation),  
between-groups comparisons**

|                                                                      | <i>KM rats<br/>(mean±Std. er. of<br/>mean)</i> | <i>Wistar rats<br/>(mean±Std. er. of<br/>mean)</i> | <i>p-value</i> |
|----------------------------------------------------------------------|------------------------------------------------|----------------------------------------------------|----------------|
| <u>Path length, m</u>                                                | <u>11,3±2,5</u>                                | <u>18,9±1,7</u>                                    | <u>0,02</u>    |
| <u>Path length in stimulus rat<br/>compartment, m</u>                | <u>3,8±0,8</u>                                 | <u>6,7±0,8</u>                                     | <u>0,01</u>    |
| <u>Path length in the empty<br/>cage compartment, m</u>              | <u>3,4±1,0</u>                                 | <u>7,3±1,2</u>                                     | <u>0,09</u>    |
| <i>Path length in the<br/>intermediate<br/>compartment, m</i>        | 4,1±0,9                                        | 4,9±0,8                                            | 0,45           |
| <i>Time spent in stimulus rat<br/>compartment, sec</i>               | 248,0±46,2                                     | 209,4±20,7                                         | 0,68           |
| <i>Time spent in the empty<br/>cage compartment, sec</i>             | 139,3±35,1                                     | 217,4±22,5                                         | 0,16           |
| <i>Time spent in the<br/>intermediate<br/>compartment, sec</i>       | 212,8±40,3                                     | 173,2±19,6                                         | 0,64           |
| <i>Number of rearings</i>                                            | 8,7±1,8                                        | 14,4±1,8                                           | 0,08           |
| <i>Number of short grooming</i>                                      | 3,1±0,7                                        | 4,9±1,0                                            | 0,25           |
| <i>Number of long grooming</i>                                       | 1,2±0,7                                        | 0,6±0,2                                            | 0,94           |
| <i>Number of short contacts<br/>with familiar stimulus rat</i>       | 2,1±0,7                                        | 3,1±0,6                                            | 0,12           |
| <u>Number of long contacts<br/>with<br/>familiar stimulus rat</u>    | <u>0,4±0,2</u>                                 | <u>2,8±0,4</u>                                     | <u>0,00007</u> |
| <u>Number of short contacts<br/>with unfamiliar stimulus<br/>rat</u> | <u>2,2±0,9</u>                                 | <u>4,6±0,7</u>                                     | <u>0,02</u>    |
| <u>Number of long contacts<br/>with<br/>unfamiliar stimulus rat</u>  | <u>1,3±0,5</u>                                 | <u>2,5±0,2</u>                                     | <u>0,02</u>    |
| <u>Number<br/>of freezing episodes</u>                               | <u>17,3±1,6</u>                                | <u>11,0±1,1</u>                                    | <u>0,008</u>   |
| <u>Total freezing time, sec</u>                                      | <u>252,6±48,8</u>                              | <u>68,8±8,6</u>                                    | <u>0,001</u>   |

|                           |         |     |      |
|---------------------------|---------|-----|------|
| Stereotypy (head waiving) | 0,4±0,2 | 0±0 | 0,12 |
|---------------------------|---------|-----|------|

*Statistical significance is calculated according to Mann-Whitney U-test.  
Significantly differing parameters are underlined. Data are represented as the  
mean ± SEM*

**Table S6. Two-objects/novel object recognition test, between-groups comparisons**

| <b>the 1<sup>st</sup> session, 2 new objects</b>   | <b>KM rats<br/>(<i>mean±SEM</i>)</b> | <b>Wistar rats,<br/>(<i>mean±SEM</i>)</b> | <b>p-value</b> |
|----------------------------------------------------|--------------------------------------|-------------------------------------------|----------------|
| <i>Path length, m</i>                              | 29,1±2,8                             | 30,5±3                                    | 0,65           |
| <i>Number of rearings</i>                          | 22,4±1,8                             | 24,2±3,3                                  | 0,85           |
| <i>Number of short grooming</i>                    | 5,0±0,7                              | 3,5±0,4                                   | 0,07           |
| <i>Number of long grooming</i>                     | 2,5±0,5                              | 2,1±0,5                                   | 0,40           |
| <i>Mean number of contacts with objects</i>        | 6,95±1,1                             | 7,9±0,6                                   | 0,34           |
| <i>Mean number of active contacts with objects</i> | 2,6±0,7                              | 0,4±0,2                                   | 0,12           |
| <i>Number of freezing episodes</i>                 | 6,9±1,5                              | 10,4±2,7                                  | 0,37           |
| <i>Total freezing time, sec</i>                    | 38,5±9,2                             | 77,5±25,4                                 | 0,24           |
| <i>Stereotypy (head waiving)</i>                   | 0,8±0,3                              | 0,9±0,3                                   | 0,93           |

*Statistical significance is calculated according to Mann-Whitney U-test.*

*Significantly differing parameters are underlined. Data are represented as the mean ± SEM*

| <b>the 2<sup>nd</sup> session, the “old” and “new” objects</b> | <b>KM rats<br/>(<i>mean±SEM</i>)</b> | <b>Wistar rats,<br/>(<i>mean±SEM</i>)</b> | <b>p-value</b> |
|----------------------------------------------------------------|--------------------------------------|-------------------------------------------|----------------|
| <i>Path length, m</i>                                          | 15,0±2,2                             | 12,4±62,2                                 | 0,35           |
| <i>Number of rearings</i>                                      | 7,2±1,4                              | 6,4±1,8                                   | 0,41           |
| <i>Number of short grooming</i>                                | 1,6±0,4                              | 1,2±0,4                                   | 0,30           |
| <i>Number of long grooming</i>                                 | 2,6±0,5                              | 2,9±0,6                                   | 0,90           |
| <i>Number of contacts with “familiar” object</i>               | 2,6±0,7                              | 1,9±0,4                                   | 0,58           |
| <i>Number of contacts with “new” object</i>                    | 2,9±0,6                              | 2,9±0,5                                   | 0,90           |
| <i>Number of active contacts with “familiar” object</i>        | 1,2±0,6                              | 0,1±0,1                                   | 0,25           |

|                                                               |                       |                       |                     |
|---------------------------------------------------------------|-----------------------|-----------------------|---------------------|
| <i><u>Number of active contacts<br/>with “new” object</u></i> | <i><u>1,8±0,4</u></i> | <i><u>0,1±0,1</u></i> | <i><u>0,002</u></i> |
| <i>Number<br/>of freezing episodes</i>                        | 16,8±2,1              | 23,2±2,2              | 0,07                |
| <i>Total freezing time, sec</i>                               | 175,4±46,4            | 236,7±38,6            | 0,14                |
| <i>Stereotypy (head waiving)</i>                              | 1,9±0,7               | 0,9±0,4               | 0,30                |

*Statistical significance is calculated according to Mann-Whitney U-test.  
Significantly differing parameters are underlined. Data are represented as the  
mean ± SEM*



**Table S7A. Social dominance “tube” test, between groups comparisons. Number of wins, for KM and Wistar groups**

|             | <b>Wins, N</b> | <b>Loses, N</b> | <b>Dead heat, N</b> |
|-------------|----------------|-----------------|---------------------|
| KM rats     | 20             | 12              | 8                   |
| Wistar rats | 12             | 20              | 8                   |

*KM rats won with a higher probability. Chi-squared  $\chi^2=4,00$ ;  $p<0,05$ .*

**Table S7B. Behavioral parameters registered in “the social dominance in a tube” test, between groups comparisons.**

|                                  | <b>KM rats,<br/>(mean<math>\pm</math>sem)</b> | <b>Wistar rats<br/>(mean<math>\pm</math>sem)</b> | <b>p-value</b> |
|----------------------------------|-----------------------------------------------|--------------------------------------------------|----------------|
| <u>Win latency</u>               | <u>111,6<math>\pm</math>14,7</u>              | <u>39,2<math>\pm</math>19</u>                    | <u>0,002</u>   |
| <u>Number of pushes</u>          | <u>9,4<math>\pm</math>1,5</u>                 | <u>13,5<math>\pm</math>1,5</u>                   | <u>0,02</u>    |
| Number of forward<br>propulsions | 2,3 $\pm$ 0,4                                 | 2,1 $\pm$ 0,4                                    | 0,71           |
| <u>Number of retreats</u>        | <u>1,0<math>\pm</math>0,4</u>                 | <u>3,6<math>\pm</math>0,4</u>                    | <u>0,001</u>   |

*Statistical significance is calculated according to Mann-Whitney U-test.*

*Significantly differing parameters are underlined. Data are represented as the mean  $\pm$  SEM*
